# Supplementary material for: Discrete Au1(0) Stabilized by 15-Crown-5 for High-Efficiency Catalytic Reduction of Nitrophenol and Nitroaniline
Source: MDPI journal article supplement (doi:10.3390/catal13040776), 2023-04-20
Supplement: s1 [file s1]

Archive with 1 entries (1 files):
- catalysts-2313577-supplementary.pdf
