# Supplementary material for: Discrete Au1(0) Stabilized by 15-Crown-5 for High-Efficiency Catalytic Reduction of Nitrophenol and Nitroaniline
Source: MDPI journal article supplement (doi:10.3390/catal13040776), 2023-04-20
Supplement: s1 [file s1 › catalysts-2313577-supplementary.pdf]

# Discrete Au<sub>1</sub>(0) Stabilized by 15-Crown-5 for High-Efficiency Catalytic Reduction of Nitrophenol and Nitroaniline

Xing Shen,<sup>[a],[b]</sup> Kairui Liu,<sup>[a]\*</sup>

(a) State Key Laboratory of Catalysis, Dalian National Laboratory for Clean Energy,  
Dalian Institute of Chemical Physics, Chinese Academy of Sciences,  
457 Zhongshan Road, Dalian 116023, China.

(b) University of Chinese Academy of Sciences, Beijing 100049, China.

\* Correspondence: liukairui@163.com

## Table of Content

|                                                                                              |    |
|----------------------------------------------------------------------------------------------|----|
| 1. Energy Dispersive X-ray analysis.....                                                     | 2  |
| 2. Comparison of K space and Q space of Au@15-crown-5/SiO <sub>2</sub> and Au foil.....      | 3  |
| 3. XPS-Cl <sub>2p</sub> spectra of 0.5 wt% Au <sub>1</sub> @15-crown-5 catalyst.....         | 4  |
| 4. Curve fit parameters for Au K-edge EXAFS for Au@15-crown-5/SiO <sub>2</sub> Standard..... | 5  |
| 5. Comparing catalytic activities to the 4-NP reduction by several catalysts.....            | 6  |
| 6. Method of TOF calculation.....                                                            | 11 |
| 7. Reduction of 4-NP in 4 minutes.....                                                       | 12 |
| 8. Spherical aberration electron microscopic images of Au@15-crown-5 after the reaction..... | 13 |

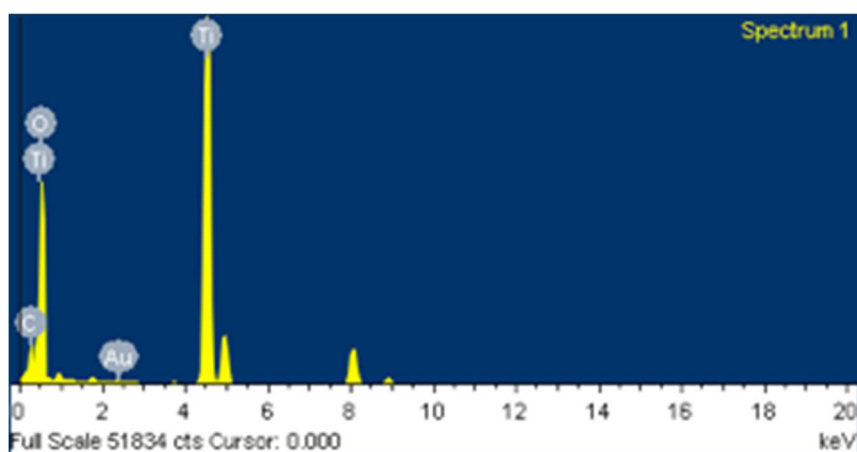

| Element | Weight% | Atomic% |
|---------|---------|---------|
| C K     | 6.35    | 13.93   |
| O K     | 31.77   | 52.34   |
| Ti K    | 61.12   | 33.63   |
| Au L    | 0.76    | 0.10    |
| Totals  | 100.00  |         |

Figure S1. Energy Dispersive X-ray analysis

Spectrum processing:

Peaks possibly omitted: 0.931, 3.691, 5.415, 6.409, 6.949 keV

Quantitation method: Cliff Lorimer thin ratio section.

Processing option: All elements analyzed (Normalised)

Number of iterations = 3

Standardless

Comparing the peak patterns of K space and Q space spectra, if the peak patterns are similar, it can be confirmed that the range of K space selected by Fourier transform to R space is reasonable (Figure S3). Figure S2 shows that the K space and Q space of Au@15-crown-5/SiO<sub>2</sub> and Au foil have good matching degree.

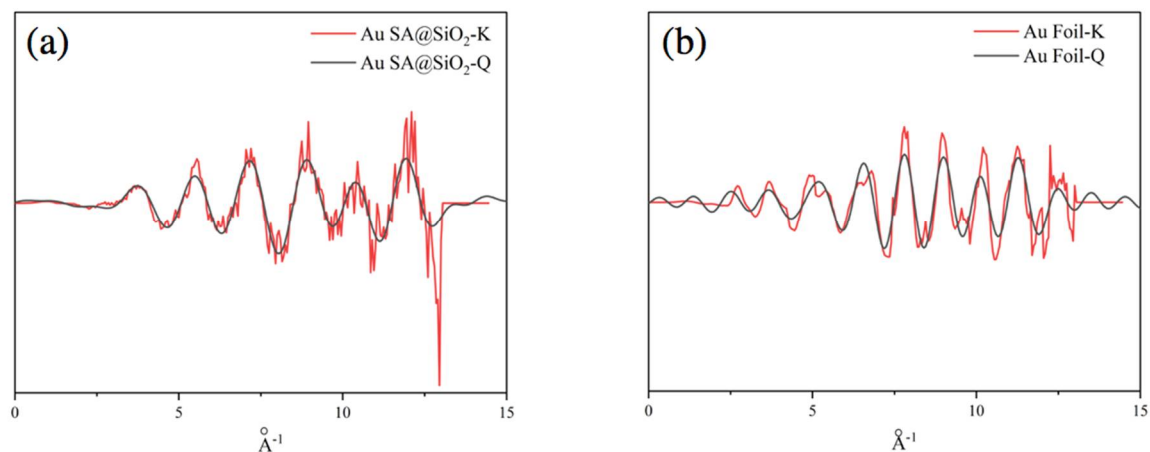

Figure S2. Comparison of K space and Q space of Au@15-crown-5/SiO<sub>2</sub> and Au foil: (a) Au@15-crown-5/SiO<sub>2</sub>; (b) Au foil

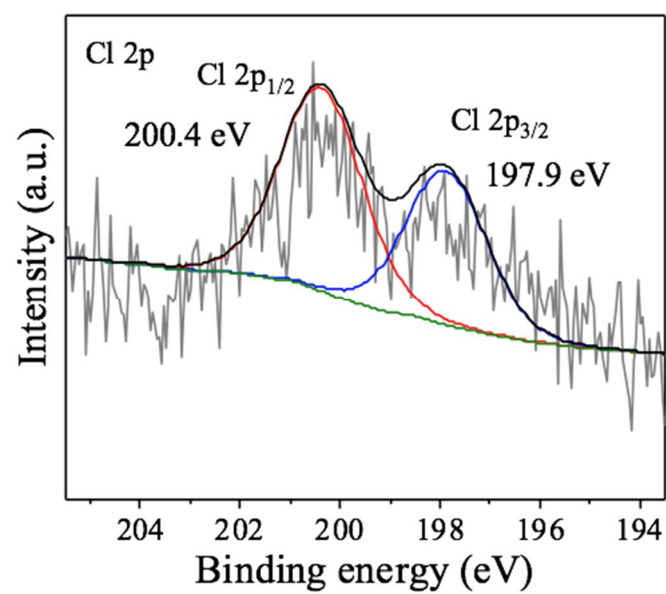

Figure S3. XPS-Cl<sub>2p</sub> spectra of 0.5 wt% Au<sub>1</sub>@15-crown-5 catalyst

Table S1. Curve fit Parameters for Au K-edge EXAFS for Au@15-crown-5/SiO<sub>2</sub> Standard

| Sample                 | Path  | CN                  | $\sigma^2(10^{-3}\text{\AA})$ | $\Delta E_0(\text{eV})$ | R ( $\text{\AA}$ )    | R-factor |
|------------------------|-------|---------------------|-------------------------------|-------------------------|-----------------------|----------|
| Au SA@SiO <sub>2</sub> | Au-H  | 1.786 ( $\pm 0.4$ ) | -0.0105                       |                         | 1.544( $\pm 0.0092$ ) |          |
|                        | Au-O  | 2.000               | 0.0404                        | 6.942                   | 2.137( $\pm 0.1260$ ) | 0.02012  |
|                        | Au-Cl | 2.050( $\pm 1.3$ )  | 0.0018                        |                         | 2.261( $\pm 0.0048$ ) |          |

$S_0$  was fixed as 0.71-0.82,  $\Delta E_0$  was refined as a global fit parameter. returning a value of  $(6.942 \pm 0.0873)$  eV. Data ranges:  $1.0 \leq k \leq 13 \text{ \AA}^{-1}$ ,  $1.0 < R \leq 3.0 \text{ \AA}$ . The number of variable parameters is 9, out of a total of 11 independent data points. The distances for Au-O are from the crystal structure of Au<sub>2</sub>O<sub>3</sub>. The distances for Au-Cl are from the crystal structure of AuCl.

Table S2. Comparing catalytic activities to the 4-NP reduction by several catalysts

| Catalyst                                   | State of catalyst | Substrate            | Catalyst                              | k/s <sup>-1</sup>      | K <sub>nor</sub> /M(s <sup>-1</sup> g <sup>-1</sup> ) | TOF or TON /h <sup>-1</sup> | conversion                                           | Refs |
|--------------------------------------------|-------------------|----------------------|---------------------------------------|------------------------|-------------------------------------------------------|-----------------------------|------------------------------------------------------|------|
| Au–Pd/TiO <sub>2</sub>                     | Bio-metal NPs     | 5×10 <sup>-6</sup> M | 1.0 wt% catalyst<br>Au 50%<br>Pd 50 % | 0.006a                 | Not mention                                           | TOF: 366                    | 30 °C<br>80%;<br>Over 4 cycle 75%                    | [15] |
| eHA <sup>a</sup> @α-Ni(OH) <sub>2</sub> -B | nanotubes         | 0.074 mM             | 0.0092 mg·mL <sup>-1</sup>            | 1.458×10 <sup>-2</sup> | 583.27                                                | TOF: 4743                   | RT<br>6 min<br>100%<br>Almost 100%<br>After 11 cycle | [26] |
| eHA@α-Ni(OH) <sub>2</sub> -B-1.5           | nanotubes         | 0.074 mM             | 0.0092 mg·mL <sup>-1</sup>            | 1.512×10 <sup>-2</sup> | 604.67                                                |                             | RT<br>6 min<br>100%<br>Almost 100%<br>After 11 cycle | [26] |
| RGO <sup>b</sup> @A C/Pd                   | SACs              | 4-NP                 | Wt %=0.292%                           |                        |                                                       | Up to TOF:602               | RT<br>99 s                                           | [29] |
| Pd <sub>1</sub> /GDY <sup>c</sup> /G-1     | SACs              | 10 <sup>-4</sup> M   | 2 mg Pd:0.151 wt %                    | 3.45×10 <sup>-3</sup>  |                                                       | 1762                        | RT<br>100%<br>over 7 cyle                            | [30] |

|                            |                                     |                                     |                         |                                |                             |                      |                                                    |      |
|----------------------------|-------------------------------------|-------------------------------------|-------------------------|--------------------------------|-----------------------------|----------------------|----------------------------------------------------|------|
| Pd <sub>1</sub> /GDY/<br>G | SACs                                | 10 <sup>-4</sup> M                  | 2mg<br>Pd:0.855<br>wt % | 0.016                          |                             | Not<br>mentione<br>d | RT<br>100%<br>over 7<br>cycle                      | [30] |
| Au/CB <sup>d</sup>         | NPs                                 | 4-NP<br>50 mL,<br>0.5 mM            | Au/CB<br>1.2% wt        | 0.0138                         |                             | TOF<br>492.48        | RT<br>5<br>min,99.9<br>%<br>over<br>10cycle<br>89% | [31] |
| Au/CB                      | NPs                                 | 2-NP<br>50 mL,<br>0.5 mM            | Au/CB<br>1.2% wt        | 0.0077                         |                             | TOF<br>492.48        | RT<br>5.5<br>min,90%                               | [31] |
| Au/CB                      | NPs                                 | 3-NP<br>50 mL,<br>0.5 mM            | Au/CB<br>1.2% wt        | 0.0074                         | not<br>mention<br>ed        | not<br>mentione<br>d | RT<br>4<br>min,90%                                 | [31] |
| Ni-<br>Pd/NrGO<br>e        | NPs                                 | 0.05 mM                             | 0.000045<br>mmol        | 0.017                          | not<br>mention<br>ed        | 416.58               | 2.67 min<br>99.5%                                  | [32] |
| Au/Cu-<br>MgO              | NCs                                 | 0.06 mM                             |                         | Up to<br>0.33×10 <sup>-3</sup> | 4.47                        | not<br>mentione<br>d |                                                    | [33] |
| Ru/CNT <sup>f</sup>        | Mixture of<br>SACs and<br>NPs(20:1) | 4-NP<br>0.3 g/L<br>0.7 g/L<br>1 g/L | 20 mg<br>Ru:1<br>at %   | 0.031<br>0.037<br>0.046        | 2959.59<br>1791.3<br>1479.8 | not<br>mentione<br>d | 78 s,100%                                          | [34] |
| Ru/CNT                     | Mixture of                          | 4-NA                                | 20 mg                   | 0.064                          | 6059.2                      | not                  | 78 s,100%                                          | [34] |

|                                    |                               |                                     |                                 |                             |                                         |                                          |                                     |      |
|------------------------------------|-------------------------------|-------------------------------------|---------------------------------|-----------------------------|-----------------------------------------|------------------------------------------|-------------------------------------|------|
|                                    | SACs and NPs(20:1)            | 0.3 g/L<br>0.7 g/L<br>1 g/L         | Ru:1<br>at %                    | 0.188<br>0.239              | 8987.53<br>7061.24                      | mentioned                                | 30 s,100%<br>30<br>s,100%*          |      |
| Ru/CNT                             | Mixture of SACs and NPs(20:1) | 2-NP<br>0.3 g/L<br>0.7 g/L<br>1 g/L | 20 mg<br>Ru:1<br>at %           | 0.027<br>0.052<br>0.102     | 2585.67<br>4962.56<br>5797.68           | not mentioned                            | 60 s,100%<br>30 s,100%<br>30 s,100% | [34] |
| BNNF <sub>8</sub> -Cu              | SACs                          | 80 mL 10 ppm                        | 10 mg                           | 0.011                       | Not mentioned                           | 690 mmol g <sup>-1</sup> h <sup>-1</sup> | 100%, 5 min over 5 cycle            | [35] |
| Au/MOF <sup>h</sup>                | SACs                          | 1 mM                                | 1.4 mg/mL<br>Surface Au:1.0% wt | 0.0415                      |                                         | TOF<br>34860                             | RT,2 min<br>> 90%                   | [27] |
| Au/MOF                             | NPs                           | 1 mM                                | 1.4 mg/mL                       | 0.0106                      |                                         | TOF<br>9780                              |                                     | [27] |
| Pt <sub>1</sub> /NMCW <sup>i</sup> | SACs                          | 3 mM                                | 50 mg Catalyst<br>Pt: 2.5 wt%   | Up to 1.73×10 <sup>-3</sup> |                                         | TOF:<br>315                              | RT, 40 min<br>≈100%                 | [36] |
| Fe/PMS <sup>j</sup>                | SACs                          | 50 mL<br>20 mg/L                    | 0.05 g/L<br>Fe                  | 5.03×10 <sup>-3</sup>       |                                         | TOF:362.4                                | Ph=6.0<br>RT<br>6 min,<br>99%       | [37] |
| Pd-CP <sup>k</sup>                 | nanoparticle                  | 2 mL<br>20 mM                       | Pd:<br>0.000032 mmol            | 0.025                       | 0.17 min <sup>-1</sup> mg <sup>-1</sup> | TOF:<br>6232.8                           | 12 min:99.9 %                       | [38] |

|                                                            |              |                        |                         |                                           |                                               |                               |                                                                                   |      |
|------------------------------------------------------------|--------------|------------------------|-------------------------|-------------------------------------------|-----------------------------------------------|-------------------------------|-----------------------------------------------------------------------------------|------|
| Pd-CNSP <sup>k</sup>                                       | nanoparticle | 2 mL<br>20 mM          | Pd:<br>0.000047<br>mmol | 0.072-<br>0.054(8 <sup>th</sup><br>cycle) | 2.17<br>min-<br><sup>1</sup> mg <sup>-1</sup> | TOF:<br>50880                 | 60 s:99.9%<br><br>After 8<br>cycle<br>conversio<br>ncan still<br>reach 98%        | [38] |
| CoMn <sub>2</sub> O <sub>4</sub> /APTPOSS@FPS <sup>i</sup> | NPs          | 2-NA<br>0.2<br>μmol/mL | 1.0 mg                  | not<br>mentione<br>d                      | not<br>mention<br>ed                          | not<br>mentione<br>d          | RT<br>100 s,95%;<br>10th cycle<br>conversio<br>ncan still<br>reach 90%            | [14] |
| CoMn <sub>2</sub> O <sub>4</sub> /APTPOSS@FPS <sup>i</sup> | NPs          | 4-NP<br>0.2<br>μmol/mL | 1.0 mg                  | 1.83×10 <sup>-2</sup>                     | not<br>mention<br>ed                          | not<br>mentione<br>d          | RT<br>100 s,95%<br>10 <sup>th</sup> cycle<br>conversio<br>ncan still<br>reach 80% | [14] |
| Ag/TP <sup>m</sup>                                         | NPs          | 2-NP                   |                         | 1.23×10 <sup>-3</sup>                     |                                               | TOF<br>3974.4<br>TON<br>63720 | 16 min<br>≈93%                                                                    | [39] |
| Ag/TP                                                      | NPs          | 4-NP                   |                         | 5.27×10 <sup>-3</sup>                     |                                               | TOF<br>230.76<br>TON<br>1152  | 6 min<br>≈98%                                                                     | [39] |

a: eHAs: etched halloysite nanotubes.

b: RGO: reduced graphene oxide; AC: amorphous carbon.

c: GDY/G: graphdiyne/graphene.

d: CB: carbon black

e: NrGO: nitrogen-doped reduced graphene oxide

f: CNT: carbon nano tube  
g: BNNF: boron nitride nanofibers  
h: MOF: Metal-OrganicFrameworks  
i: NMCW: N-doped mesoporous carbon nanowires  
j: PMS: peroxymonosulfate  
k: CP: acid polymer; CNSP: phytic acid/thiourea polymer.  
l: APTPOSS: octakis [3-(3-aminopropyltriethoxysilane) propyl] octasilsesquioxane; FPS: fibrous phosphosilicate  
m: TP: taro powder

We calculated TOF based on the number of reaction substrates (e.g., 4-nitrophenol) converted by each gold atom per unit time.

TOF calculation process:

$$\text{Figure 6b: TOF} = \frac{25 \text{ ml} \times (2 \times 10^{-4} \text{ mol/L})}{2.265 \times 10^{-4} \text{ mol/L} \times (2 \times 10^{-3}) \text{ ml}} \times \frac{60}{30} = 22075;$$

25ml: The amount of 4-nitrophenol added;

$2 \times 10^{-4}$  mol/L: The concentration of 4-nitrophenol.

$2.265 \times 10^{-4}$  mol/L: The concentration of the catalyst.

$2 \times 10^{-3}$  ml: The amount of catalyst added.

30min: Reaction time

$$\text{Figure 6c: TON}_{(\text{Max})}: \frac{150 \text{ ml} \times (2 \times 10^{-4} \text{ mol/L}) \times 31\%}{2.265 \times 10^{-4} \text{ mol/L} \times 0.2 \times 10^{-3}} = 205298$$

150 ml: The amount of 4-nitrophenol added;

$2 \times 10^{-4}$  mol/L: The concentration of 4-nitrophenol.

$2.265 \times 10^{-4}$  mol/L: The concentration of the catalyst.

$0.2 \times 10^{-3}$  ml: The amount of catalyst added.

Figure 7:

$$\text{TOF} = \frac{25 \text{ ml} \times (2 \times 10^{-4} \text{ mol/L})}{2.265 \times 10^{-4} \text{ mol/L} \times (2 \times 10^{-3}) \text{ ml}} \times \frac{60}{50} = 13245;$$

$$\text{TOF} = \frac{25 \text{ ml} \times (2 \times 10^{-4} \text{ mol/L})}{2.265 \times 10^{-4} \text{ mol/L} \times (2 \times 10^{-3}) \text{ ml}} \times \frac{60}{60} = 11038;$$

$$\text{TOF} = \frac{25 \text{ ml} \times (2 \times 10^{-4} \text{ mol/L})}{2.265 \times 10^{-4} \text{ mol/L} \times (2 \times 10^{-3}) \text{ ml}} \times \frac{60}{65} = 10348;$$

50, 60, 65 are reaction times.

If we increase the quantity of the catalyst, the reaction time can be reduced to less than 4 minutes.

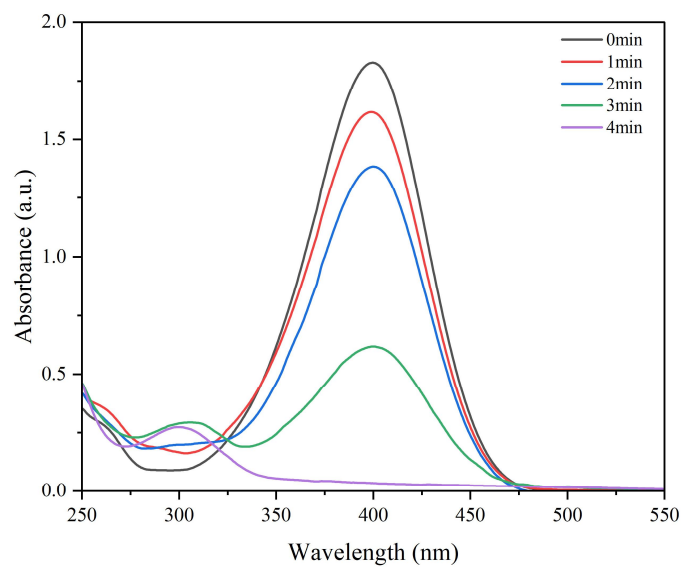

Figure S4. Reduction of 4-NP in 4 minutes

After the p-nitrophenol reduction reaction, the spherical aberration electron microscope is used to detect the state of the catalyst. The results of spherical aberration electron microscopy showed that most of the Au remained in a single-atom state distribution, but some of the Au elements are aggregated into nanoparticles after the reaction.

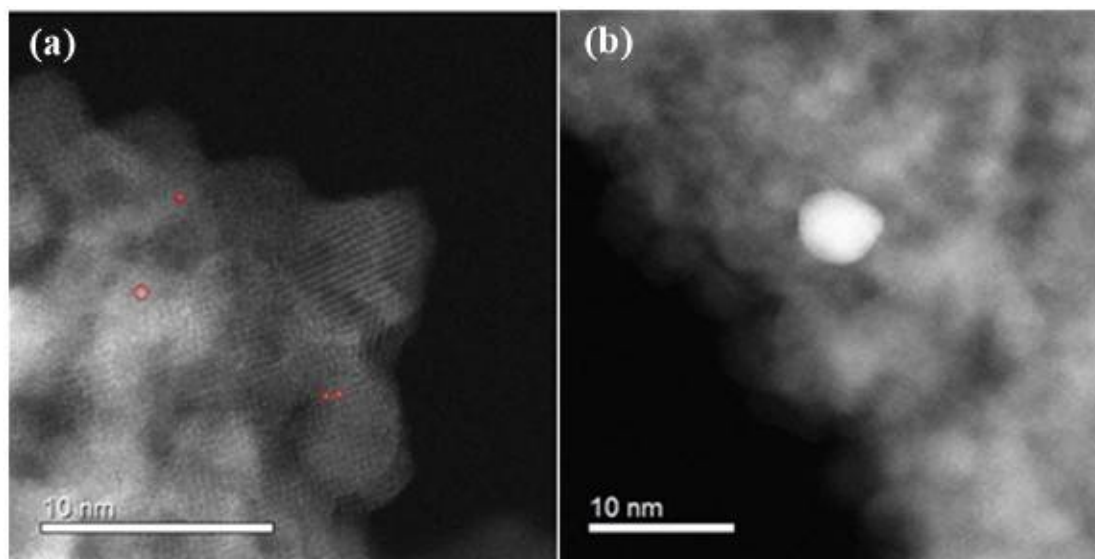

Figure S5. spherical aberration electron microscopic images of Au@15-crown-5 after the reaction: (a) Monodisperse catalyst after reaction. (b) Catalyst agglomerated after reaction.
